# Supplementary material
Source: Springer Nature journal article supplement (https://www.springermedizin.de/resource/supplementary/12937_2007_160_MOESM2_ESM.pdf/25654526)
Supplement: MOESM2 [file 25654526]

## Additional file 2 - Summary of blood collection and analytical methods

| Study                                  | Fasting blood | Blood storage condition and stabilizer                                                                       | Analytical method used                                          | Vitamin C concentration (µmol/l)                                                        |
|----------------------------------------|---------------|--------------------------------------------------------------------------------------------------------------|-----------------------------------------------------------------|-----------------------------------------------------------------------------------------|
| 1. Bingham et al., 1995 [12]           | Yes           | Within 3-4 hrs. returned to lab in insulated picnic box. Stabilizer; Meta-phosphoric acid. Stored at -40° C. | Liquid chromatography with electrochemical detection            | Lower quintile 69.0 (5.0)<br>Middle quintile 62.0 (4.0)<br>Topper quintile 61.0 (5.0)   |
| 2. Bingham et al., 1997 [13]           | Yes           | Within 3-4 hrs. returned to lab in insulated picnic box. Stabilizer; Meta-phosphoric acid. Stored at -40° C. | Liquid chromatography with electrochemical detection            | Lower quintile 69.0 (5.0)<br>Middle quintile 62.0 (4.0) 1<br>Topper quintile 61.0 (5.0) |
| 3. Block et al., 2001 [33]             | NR            | Within few hr. returned to lab. Stabilizer; Meta-phosphoric acid. Stored at -70° C.                          | Spectrophotometrically by using 2,4 dinitrophenylhydrazine      | 56.8 (22.7)                                                                             |
| 4. Boeing et al., 1997 [34]            | NR            | Immediately protected from light. Stabilizer; Meta-phosphoric acid. Stored at -80° C.                        | Measured by Hoffman LaRoche in Basel                            | First quintile 7.0 (2.3)<br>Third quintile 7.4 (2.1)<br>Fifth quintile 8.1 (1.5)        |
| 5. Bolton-Smith et al., 1991 [28]      | NR            | Immediately analyzed                                                                                         | NR                                                              | Non-smoker 37 (33.1)<br>Smoker 18.4 (17.0)                                              |
| 6. Chiplonkar et al., 2002 [35]        | Yes           | Within 2 hrs. returned to lab in insulated ice bag.                                                          | Spectrophotometer                                               | Men 17.0 (6.3)<br>Women 19.9 (6.8)                                                      |
| 7. Costa de Carvalho et al., 1996 [36] | Yes           | Sample kept on ice and protected from light. Stored at -30° C                                                | Colorimetric dinitrophenylhydrazin method                       | Men 64.6 (28.9)<br>Women 76.5 (27.8)                                                    |
| 8. Cooney et al., 1995 [37]            | Yes           | Sample kept at 4° C or 30 min. Stored at -70° C. Stabilizer; Meta-phosphoric acid.                           | Spectrophotometrically with the use of dichlorophenolindophenol | 89.6 (43.0)                                                                             |
| 9. Drewnowski et al., 1997 [15]        | Yes           | NR                                                                                                           | Automated method based on the continuous flow principle         | Age group<br>30-40y: 49(30)<br>40-50 y: 42(19)<br>50-65 y: 51(20)                       |

**Additional file 2** (Continued)

|                                    |                                                  |                                                                                                                        |                                                                                                               |                                                                        |
|------------------------------------|--------------------------------------------------|------------------------------------------------------------------------------------------------------------------------|---------------------------------------------------------------------------------------------------------------|------------------------------------------------------------------------|
| 10. EPIC group of Spain, 1997 [38] | Yes                                              | Kept from light immediately. Stabilizer; Meta-phosphoric acid. Stored at -180° C.                                      | Microfluorimetric method                                                                                      | Men<br>19.1 (7.1)<br>Women<br>28.8 (8.9)                               |
| 11. Faruque et al., 1995 [39]      | NR                                               | Plasma immediately mixed with Trichloroacetic acid. Stored at -20° C.                                                  | Dinitrophenylhydrazin method                                                                                  | Non-smoker<br>30.1 (1.7)<br>Smoker<br>22.1 (1.1)                       |
| 12. Hudiburgh et al., 1979 [40]    | Yes                                              | NR                                                                                                                     | Zannoni et al (1974). Micro-modification method which relies on the reduction of ferric iron by ascorbic acid | 68.0 (14.8)                                                            |
| 13. Jacques et al., 1993 [41]      | NR                                               | NR                                                                                                                     | 2,4-dinitrophenylhydrazine method                                                                             | 67 (25)                                                                |
| 14. Katsouyanni et al., 1997 [42]  | Yes                                              | Plasma stored at -70° C.                                                                                               | HPLC                                                                                                          | NR                                                                     |
| 15. Loria et al., 1998 [43]        | ½ subjects randomly had fasting blood 10-16 hrs. | Shipped on dry ice to lab. Stabilizer; Meta-phosphoric acid                                                            | 2,4-dinitrophenylhydrazine method                                                                             | Median (min – Max)<br>51.1 (22.7-73.8)                                 |
| 16. Malekshah et al., 2006 [44]    | NR                                               | Kept from light in -8 to +1 ° C for max 2hr. Stabilizer; Meta-phosphoric acid. stored in -80° C                        | Fluorometric assay                                                                                            | First measurement<br>19.21 (7.8)<br>Second measurement<br>25.68(11.03) |
| 17. McKeowen et al., 2001 [45]     | Yes                                              | Taken to lab 3-4 hr after blood withdraw, stored in 4-7° C for 1 week until analyzed. stabilizer; Meta-phosphoric acid | Fluorometric assay                                                                                            | Men:<br>58 (17.5)<br>Women:<br>65.2 (20)                               |
| 18. Porrini et al., 1995 [46]      | Yes                                              | EGTA_Glutathione and protected from light                                                                              | Enzymatic oxidation of L-AA, condensed with <i>O</i> -phenylenediamine . Analyzed with HPLC                   | 56.2 (14.8)                                                            |
| 19. Palli et al., 1999 [47]        | Yes                                              | Kept from light in 4 -8 ° C for max 2hr. Stored at -30° C in lab. stabilizer; Meta-phosphoric acid                     | Fluorometric assay                                                                                            | 38.6 (1.1)                                                             |
| 20. Riemersma et al., 2000 [48]    | Yes                                              | Stored at -40° C                                                                                                       | Enzymatic oxidation                                                                                           | NR                                                                     |
| 21. Rousseau et al. 2004 [49]      | Yes                                              | Immediately protected from light. Stored -80° C. Stabilizer; Meta-phosphoric acid                                      | Fluorimetry using an automated method.                                                                        | Male:<br>59.3 (13.7)<br>Female:<br>65.6 (13.5)                         |
| 22. Schroder et al., 2001 [50]     | Yes                                              | Homocystein/ 10% trichloroacetic acid add to plasama and stored at -80° C.                                             | Liquid chromatography with electrochemical detection                                                          | NR                                                                     |

**Additional file 2** (Continued)

|                              |     |                                                                                                    |                                                                                |             |
|------------------------------|-----|----------------------------------------------------------------------------------------------------|--------------------------------------------------------------------------------|-------------|
| 23. Simon et al., 2001 [2]   | Yes | Stored at -70 to -80° C. stabilizer; Meta-phosphoric acid                                          | HPLC technique                                                                 | >22.7       |
| 24. Sinha et al., 1992 [51]  | Yes | Kept on ice for 30 min until processing. Stored at -70 to -80° C. stabilizer; Meta-phosphoric acid | 2,4-dinitrophenylhydrazine method                                              | 58.5 (2.0)  |
| 25. Tugane et al., 1998 [52] | NR  | Frozen after 30 min by dry ice. Stored at -70 to -80° C. stabilizer; Meta-phosphoric acid          | Fluorimetrically (iodine oxidation and condensation with 1,2-phenylenediamine) | 42.9 (15.0) |
| 26. Wright et al., 1995 [53] | Yes | Placed on dry ice until processing. Stored at -40° C. . stabilizer; Meta-phosphoric acid           | HPLC technique                                                                 | 49.4 (4.0)  |
